# SARS-CoV-2 neutralising antibodies in Dogs and Cats in the United Kingdom

\*Shirley L. Smith<sup>1</sup>, \*Enyia. R. Anderson<sup>2</sup>, Cintia Cansado-Utrilla<sup>2</sup>, Tessa Prince<sup>1</sup>, Sean Farrell<sup>1</sup>,  
Bethaney Brant<sup>1</sup>, Stephen Smyth<sup>1</sup>, Peter-John M. Noble<sup>1</sup>, Gina L. Pinchbeck<sup>1</sup>, Nikki  
Marshall<sup>3</sup>, Larry Roberts<sup>3</sup>, Grant L. Hughes<sup>2</sup>, \*Alan D. Radford<sup>1</sup> and \*Edward I. Patterson<sup>2,4</sup>.

<sup>1</sup>Institute of Infection, Veterinary and Ecological Sciences, University of Liverpool, Leahurst  
Campus, Neston, Wirral, CH64 7TE, UK

<sup>2</sup>Departments of Vector Biology and Tropical Disease Biology, Centre for Neglected Tropical  
Disease, Liverpool School of Tropical Medicine, Liverpool L3 5QA, UK

<sup>3</sup>Idexx Laboratories Ltd, Grange House, Sandbeck Way, Wetherby LS22 7DN

<sup>4</sup>Department of Biological Sciences, Brock University, St. Catharines, ON L2S 3A1, Canada

\*These authors contributed equally to this work.

Corresponding author: Edward I. Patterson, Department of Biological Sciences, Brock  
University, St. Catharines, ON L2S 3A1, Canada  
Email address: [ipatterson@brocku.ca](mailto:ipatterson@brocku.ca)

## Abstract

Companion animals are susceptible to SARS-CoV-2 infection and sporadic cases of pet infections have occurred in the United Kingdom. Here we present the first large-scale serological survey of SARS-CoV-2 neutralising antibodies in dogs and cats in the UK. Results are reported for 688 sera (454 canine, 234 feline) collected by a large veterinary diagnostic laboratory for routine haematology during three time periods; pre-COVID-19 (January 2020), during the first wave of UK human infections (April-May 2020) and during the second wave of UK human infections (September 2020-February 2021). Both pre-COVID-19 sera and those from the first wave tested negative. However, in sera collected during the second wave, 1.4% (n=4) of dogs and 2.2% (n=2) cats tested positive for neutralising antibodies. The low numbers of animals testing positive suggests pet animals are unlikely to be a major reservoir for human infection in the UK. However, continued surveillance of in-contact susceptible animals should be performed as part of ongoing population health surveillance initiatives.

## Key words

SARS-CoV-2, serology, dogs, cats, animal disease surveillance

## Introduction

Severe acute respiratory syndrome coronavirus-2 (SARS-CoV-2) emerged in Wuhan, China at the end of 2019 [1] and rapidly spread around the world. The main route of transmission remains human-to-human. However, there is evidence that the virus can infect animals [2] and it is important that we remain vigilant of such infections; particularly in companion animals with whom humans often have close contact.

49

50 Although initially there were only sporadic cases of infection in cats and dogs [3-5], there  
 51 are now numerous reports of infection detected by RT-PCR or virus isolation [6-10],  
 52 including in the UK [11]. Evidence of infection of cats and dogs has also been provided by  
 53 the detection of anti-SARS-CoV-2 antibodies in several studies; from Italy, France, Germany,  
 54 Croatia and China [12-17]. Experimental infections have shown that cats and, to a lesser  
 55 extent, dogs are susceptible to SARS-CoV-2 and that cats can transmit the virus to other cats  
 56 [18-20]. Infections in companion animals appear to have occurred as a result of human-to-  
 57 animal transmission; however, the reported transmission of SARS-CoV-2 from farmed mink  
 58 to in-contact humans, cats and dogs [21, 22] and the detection of the virus in stray dogs and  
 59 cats [23, 24], suggest it is important to continue surveillance in companion animals. Here we  
 60 conducted a survey of SARS-CoV-2 neutralising antibodies in cats and dogs attending UK  
 61 veterinary practices.

62

## 63 Methods

### 64 Samples

65 Canine and feline sera used in this study were obtained from the UK Virtual Biobank, which  
 66 uses health data from commercial diagnostic laboratories participating in the Small Animal  
 67 Veterinary Surveillance Network (SAVSNET) to target left over diagnostic samples in the  
 68 same laboratories for enhanced phenotypic and genomic analyses [25]. All samples were  
 69 residual sera remaining after routine diagnostic testing and were sent by the contributing  
 70 laboratory based on convenience within the following parameters: samples were requested  
 71 from UK cats and dogs collected over two time periods; March and April 2020 (early  
 72 pandemic) for both cats and dogs, then September 2020 to February 2021 for dogs, and

January 2021 for cats (late pandemic). Serum samples collected from the same laboratory in early January 2020 were also tested as pre-COVID-19 controls. All samples were linked to electronic health data for that sample (species, breed, sex, postcode of the submitting veterinary practice, date received by the diagnostic laboratory) held in the SAVSNET database, using a unique anonymised identifier. Data on SARS-CoV-2 exposure or symptoms was not available. Ethical approval to collect electronic health data (SAVSNET) and physical samples from participating laboratories (National Virtual Biobank) was granted by the Research Ethics Committee at the University of Liverpool (RETH000964).

## Neutralising antibody detection in serum samples

Serum samples were screened for SARS-CoV-2 neutralising antibodies using the plaque reduction neutralisation test (PRNT) as previously described [15], with the SARS-CoV-2/human/Liverpool/REMRQ0001/2020 isolate cultured in Vero E6 cells [26]. Briefly, sera were heat inactivated at 56°C for 30 mins and stored at -20°C until use. DMEM containing 2% FBS was used to dilute sera ten-fold followed by serial two-fold dilution. SARS-CoV-2 at 800 plaque forming units (PFU)/ml was added to diluted sera and incubated at 37°C for 1 h. The virus/serum mixture was then inoculated onto Vero E6 cells, incubated at 37°C for 1 h, and overlaid as in standard plaque assays [27]. Cells were incubated for 48 h at 37°C and 5% CO<sub>2</sub>, fixed with 10% formalin and stained with 0.05% crystal violet solution. PRNT<sub>80</sub> was determined by the highest dilution with 80% reduction in plaques compared to the control. Samples with detectable neutralising antibody titre were repeated as technical replicates for confirmation. Where titres differed between technical replicates, the lowest dilution was reported.

## Results

A total of 732 samples were received from the diagnostic laboratory and tested for SARS-CoV-2 neutralising antibodies. Linking of data to the samples found that 22 samples were duplicates (duplicate samples gave the same result in each replicate and are therefore reported as one sample). Seven samples were from animals with non-UK postcodes, two samples did not have species data, two samples were received as dogs but were actually from cats and were collected outside the two time periods of cat sample collection and eleven samples were missing postcodes; these samples were excluded. Results are therefore reported for 688 sera (454 canine, 234 feline) of which 558 (372 dogs, 186 cats) were collected during the SARS-CoV-2 pandemic and 130 (82 dogs, 48 cats) were collected from animals before the first confirmed human case in the UK (21<sup>st</sup> January 2020 [28]) - pre-COVID-19 samples; these samples were distributed across the UK (Figure 1). Of the dog sera collected during the pandemic, 0/85 (0%) collected in March/April 2020 and 4/287 (1.4%) collected September 2020-February 2021 tested positive for neutralising antibodies with titres ranging from 1:20 to 1:80. In cats, 0/96 (0%) sera collected in March/April 2020 tested positive for neutralising antibodies and 2/90 (2.2%) collected in January 2021 tested positive with titres of 1:40 and 1:80. Pre-COVID-19 sera from both dogs (n=82) and cats (n=48) tested negative for neutralising antibodies. Positive samples in dogs were collected in November 2020 (n=1), January 2021 (n=2) and February 2021 (n=1) and were collected in Kent, Buckinghamshire, Worcestershire and Yorkshire, respectively (Figure 1). The two positive cats were collected in January 2021; one in Birmingham and the other in London (Figure 1).

## Discussion

SARS-CoV-2 emerged in humans in China late in 2019, rapidly spreading across the world. Studies of companion animals from several countries have shown that they too can be infected with the virus. In the UK, there are sporadic reports of infection in cats and dogs [11, 29], however, there has been no large scale test of infection. Here we show that a small proportion of UK dogs and cats sampled at a time of active human transmission tested positive for SARS-CoV-2 neutralising antibodies.

Sera from two time points during the pandemic were analysed. Sera collected early in the pandemic, during March and April 2020, from both cats and dogs were negative for neutralising antibodies. Previous studies using European samples have shown a low level of infection, highest in Italy, where 3.3% (15/451) of dog sera and 5.8% (11/191) cat sera collected between March and May 2020 had measurable neutralising antibody titres [15]. These samples were purposefully collected from regions of Italy with a high prevalence of infection in humans, in some cases from households known to contain recently diagnosed human cases. Our results in contrast, are more consistent with a survey from a similar population of cats in Germany, that found 0/221 samples collected in April and May of 2020 to be positive for anti-SARS-CoV-2 antibodies using ELISA [13], and with a survey in the Netherlands in April-May 2020, that found 0.4% of cats and 0.2% dogs to be seropositive [30]. Lack of positive samples from this time period in the UK (April-May2020) likely reflects the selection criteria of the animals assayed (undergoing routine haematological testing and not selected based on location), and the relatively low rate of human disease at the time compared to Italy.

In sera collected later in the pandemic, 4/287 (1.4%) dogs and 2/90 (2.2%) cats tested positive. Positive dog samples were collected in November 2020 and January and February of 2021. Positive cats were collected in January 2021. This is again broadly in line with a recent German survey conducted from September 2020 to February 2021, showing a seroprevalence of 1.36%, that the authors concluded corresponded with the rise of reported cases in the human population, and was suggestive of ongoing transmission from owners to their cats [14].

Cats and dogs can be infected with other coronaviruses, leading to the possibility that SARS-CoV-2 neutralising antibodies in cats and dogs may result from previous infection with a different virus. We and others have previously demonstrated a lack of cross-reactivity between SARS-CoV-2 and samples containing antibodies to feline coronavirus (FCoV), canine enteric coronavirus (CeCoV) and canine respiratory coronavirus (CRCoV) [13, 15, 16]; all of which are endemic in UK cats and dogs [31-33]. Here we also tested samples from UK cats and dogs collected before the human index case in the UK (21<sup>st</sup> January 2020 [28]). All pre-COVID-19 samples were negative for SARS-CoV-2 neutralising antibodies. Similar results have been reported for both cats and dogs by others [30], suggesting that antibodies produced following infection by cat and dog coronaviruses do not cross react with SARS-CoV-2.

Here we made use of samples collected from a commercial diagnostic laboratory contributing data to a voluntary national surveillance scheme (SAVSNET) to efficiently test for evidence of prior SARS-CoV-2 infection in UK cats and dogs. The major limitations of such a system are the relatively sparse data available for each sample such that individual

animals, that are not identifiable, may have been sampled twice or have come from the same household. In addition, such samples lack detailed information on the health of the animals and whether they were from a COVID-19-positive household. However, acquiring such samples from the UK Virtual Biobank, offers a responsive resource for studying national patterns of disease in UK pets [25].

We report here the detection of SARS-CoV-2 neutralising antibodies during the second wave of human infections in the UK. Other groups have previously reported that cats and dogs can become infected, likely through their interactions with humans. Although animal-to-animal transmission has been reported, for example on mink farms and in experimental infections [18-20, 22, 34], the small numbers of companion animals testing positive in the field suggest that pets are not currently acting as a significant reservoir for infection, and that the pandemic will be controlled by measures largely focussed on minimising human-to-human transmission. However, studies like that presented here strongly argue for continued surveillance of in-contact, susceptible animal species, which will help determine whether in the future, more targeted control measures are needed for pet animals, particularly in regions that are gaining control of infection in their human populations.

## Funding

SLS, ADR, PJN and GLP were supported by funding from Dogs Trust. GLH was supported by the BBSRC (BB/T001240/1 and BB/V011278/1), a Royal Society Wolfson Fellowship (RSWF\R1\180013), the NIH (R21AI138074), the UKRI (20197 and 85336), and the NIHR (NIHR2000907). GLH and TP are affiliated to the National Institute for Health Research Health Protection Research Unit (NIHR HPRU) in Emerging and Zoonotic Infections at



University of Liverpool in partnership with Public Health England (PHE), in collaboration with Liverpool School of Tropical Medicine and the University of Oxford. The views expressed are those of the author(s) and not necessarily those of the NHS, the NIHR, the Department of Health or Public Health England. EIP and GLH were supported by the EPSRC (V043811/1) and UKRI-BBSRC COVID rolling fund (BB/V017772/1). CCU was supported by the Medical Research Council (N013514/1). Funding sources had no involvement in the design or conduct of the study or in the preparation of the manuscript.

#### Conflict of interest

NM and LR are employed by IDEXX Laboratories. All other authors declare no competing interests.

#### References

1. Wu F, Zhao S, Yu B, et al. A new coronavirus associated with human respiratory disease in China. *Nature* **2020**; 579:265-9.
2. Prince T, Smith, S.L., Radford, A.D., Solomon, T. Hughes, G.L. and Patterson, E. I. SARS-CoV-2 Infections in Animals: Reservoirs for Reverse Zoonosis and Models for Study. *Viruses* **2021**; 13.
3. Garigliany M, Van Laere AS, Clercx C, et al. SARS-CoV-2 Natural Transmission from Human to Cat, Belgium, March 2020. *Emerg Infect Dis* **2020**; 26:3069-71.
4. Newman A, Smith D, Ghai RR, et al. First Reported Cases of SARS-CoV-2 Infection in Companion Animals - New York, March-April 2020. *MMWR Morb Mortal Wkly Rep* **2020**; 69:710-3.
5. Sit THC, Brackman CJ, Ip SM, et al. Infection of dogs with SARS-CoV-2. *Nature* **2020**.

- 216 6. Barrs VR, Peiris M, Tam KWS, et al. SARS-CoV-2 in Quarantined Domestic Cats from  
217 COVID-19 Households or Close Contacts, Hong Kong, China. *Emerg Infect Dis* **2020**; 26:3071-  
218 4.
- 219 7. Decaro N, Vaccari G, Lorusso A, et al. Possible Human-to-Dog Transmission of SARS-CoV-  
220 2, Italy, 2020. *Emerg Infect Dis* **2021**; 27.
- 221 8. Hamer SA, Pauvolid-Correa A, Zecca IB, et al. SARS-CoV-2 Infections and Viral Isolations  
222 among Serially Tested Cats and Dogs in Households with Infected Owners in Texas, USA.  
223 *Viruses* **2021**; 13.
- 224 9. Ruiz-Arrondo I, Portillo A, Palomar AM, et al. Detection of SARS-CoV-2 in pets living with  
225 COVID-19 owners diagnosed during the COVID-19 lockdown in Spain: A case of an  
226 asymptomatic cat with SARS-CoV-2 in Europe. *Transbound Emerg Dis* **2020**.
- 227 10. Sailleau C, Dumarest M, Vanhomwegen J, et al. First detection and genome sequencing  
228 of SARS-CoV-2 in an infected cat in France. *Transbound Emerg Dis* **2020**; 67:2324-8.
- 229 11. Hosie MJ, Epifano I, Herder V, et al. Detection of SARS-CoV-2 in respiratory samples from  
230 cats in the UK associated with human-to-cat transmission. *Vet Rec* **2021**; 188:e247.
- 231 12. Fritz M, Rosolen B, Krafft E, et al. High prevalence of SARS-CoV-2 antibodies in pets from  
232 COVID-19+ households. *One Health* **2021**; 11:100192.
- 233 13. Michelitsch A, Hoffmann D, Wernike K, Beer M. Occurrence of Antibodies against SARS-  
234 CoV-2 in the Domestic Cat Population of Germany. *Vaccines (Basel)* **2020**; 8.
- 235 14. Michelitsch A, Schon J, Hoffmann D, Beer M, Wernike K. The Second Wave of SARS-CoV-  
236 2 Circulation-Antibody Detection in the Domestic Cat Population in Germany. *Viruses* **2021**;  
237 13.
- 238 15. Patterson EI, Elia G, Grassi A, et al. Evidence of exposure to SARS-CoV-2 in cats and dogs  
239 from households in Italy. *Nat Commun* **2020**; 11:6231.

- 240 16. Stevanovic V, Vilibic-Cavlek, T., Tabain, I., Benven, I., Kovac, S., Hruskar, Z., Mauric, M.,  
241 Milasincic, L., Antolasic, L., Skrinjaric, A., Staresina, V. and Barbic, L. Seroprevalence of SARS-  
242 CoV-2 infection among pet animals in Croatia and potential public health impact.  
243 Transbound Emerg Dis **2020**.
- 244 17. Zhang Q, Zhang H, Gao J, et al. A serological survey of SARS-CoV-2 in cat in Wuhan.  
245 Emerg Microbes Infect **2020**; 9:2013-9.
- 246 18. Bosco-Lauth AM, Hartwig AE, Porter SM, et al. Experimental infection of domestic dogs  
247 and cats with SARS-CoV-2: Pathogenesis, transmission, and response to reexposure in cats.  
248 Proc Natl Acad Sci U S A **2020**; 117:26382-8.
- 249 19. Halfmann PJ, Hatta M, Chiba S, et al. Transmission of SARS-CoV-2 in Domestic Cats. N  
250 Engl J Med **2020**.
- 251 20. Shi J, Wen Z, Zhong G, et al. Susceptibility of ferrets, cats, dogs, and other domesticated  
252 animals to SARS-coronavirus 2. Science **2020**; 368:1016-20.
- 253 21. Oude Munnink BB, Sikkema RS, Nieuwenhuijse DF, et al. Transmission of SARS-CoV-2 on  
254 mink farms between humans and mink and back to humans. Science **2021**; 371:172-7.
- 255 22. van Aart AE VF, Fischer EAJ, Broens EM, Egberink H, Zhao S, Engelsma M, Hakze-van der  
256 Honing RW, Harders F, de Rooij MMT, Radstake C, Meijer PA, Oude Munnink BB, de Rond J,  
257 Sikkema RS, van der Spek AN, Spierenburg M, Wolters WJ, Molenaar RJ, Koopmans MPG,  
258 van der Poel WHM, Stegeman A, Smit LAM. SARS-CoV-2 infection in cats and dogs in  
259 infected mink farms. Transboundary and Emerging Diseases **2021**.
- 260 23. Dias HG, Resck MEB, Caldas GC, et al. Neutralizing antibodies for SARS-CoV-2 in stray  
261 animals from Rio de Janeiro, Brazil. PLoS One **2021**; 16:e0248578.
- 262 24. Villanueva-Saz S, Giner J, Tobajas AP, et al. Serological evidence of SARS-CoV-2 and co-  
263 infections in stray cats in Spain. Transbound Emerg Dis **2021**.

25. Smith SL, Afonso MM, Roberts L, Noble PM, Pinchbeck GL, Radford AD. A virtual biobank for companion animals: A parvovirus pilot study. *Vet Rec* **2021**:e556.
26. Patterson EI, Prince, T., Anderson, E. I., Casas-Sanchez, A., Smith, S. L., Cansado-Utrilla, C., Turtle, L. and Hughes, G. L. Methods of inactivation of SARS-CoV-2 for downstream biological assays. **2020**.
27. Rossi SL, Russell-Lodrigue KE, Killeen SZ, et al. IRES-Containing VEEV Vaccine Protects Cynomolgus Macaques from IE Venezuelan Equine Encephalitis Virus Aerosol Challenge. *PLoS Negl Trop Dis* **2015**; 9:e0003797.
28. Lillie PJ, Samson A, Li A, et al. Novel coronavirus disease (Covid-19): The first two patients in the UK with person to person transmission. *J Infect* **2020**; 80:578-606.
29. Ferasin L, Fritz, M., Ferasin, H., Becquart, P., Legros, V. and Leroy, E. M. Myocarditis in naturally infected pets with the British variant of COVID-19. *BioRxiv Preprint* **2021**.
30. Zhao S, Schuurman N, Li W, et al. Serologic Screening of Severe Acute Respiratory Syndrome Coronavirus 2 Infection in Cats and Dogs during First Coronavirus Disease Wave, the Netherlands. *Emerg Infect Dis* **2021**; 27:1362-70.
31. Addie DD, Jarrett JO. Feline coronavirus antibodies in cats. *Vet Rec* **1992**; 131:202-3.
32. Priestnall SL, Brownlie J, Dubovi EJ, Erles K. Serological prevalence of canine respiratory coronavirus. *Vet Microbiol* **2006**; 115:43-53.
33. Stavisky J, Pinchbeck GL, German AJ, et al. Prevalence of canine enteric coronavirus in a cross-sectional survey of dogs presenting at veterinary practices. *Vet Microbiol* **2010**; 140:18-24.
34. Oreshkova N, Molenaar RJ, Vreman S, et al. SARS-CoV-2 infection in farmed minks, the Netherlands, April and May 2020. *Euro Surveill* **2020**; 25.

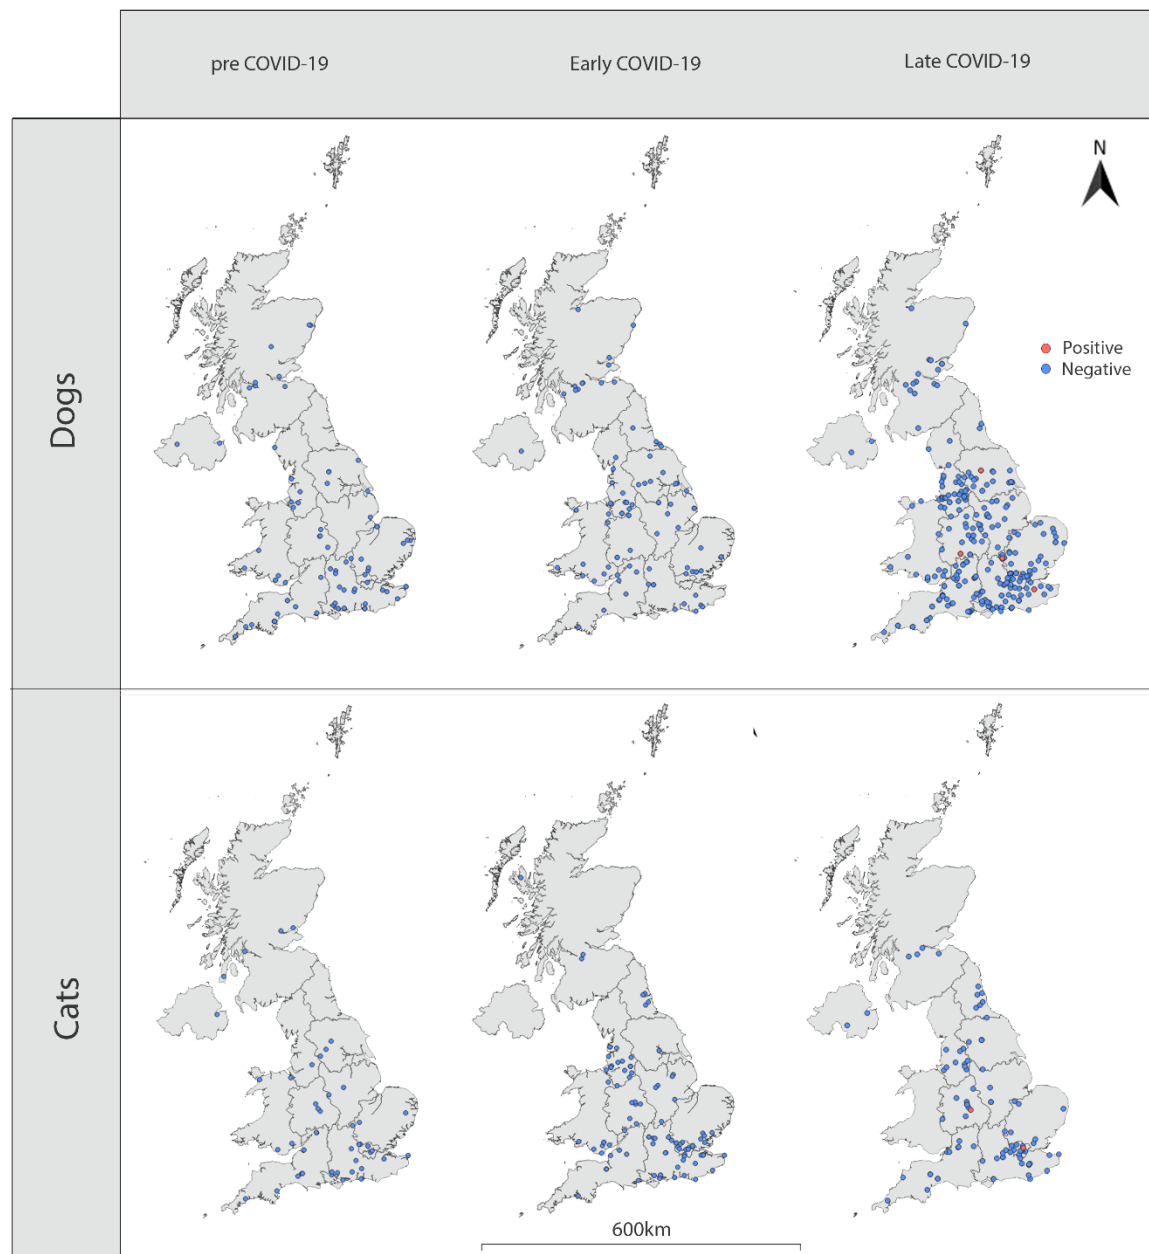

288

289 Figure 1: Schematic map showing the location of samples for which testing of SARS-CoV-2

290 neutralising antibodies is reported. Red dots indicate samples that were positive for SARS-

291 CoV-2 neutralising antibodies using PRNT<sub>80</sub>. Blue dots indicate samples that were negative.
